# Supplementary material for: Prioritization, clustering and functional annotation of MicroRNAs using latent semantic indexing of MEDLINE abstracts
Source: Springer Nature journal article supplement (doi:10.1186/s12859-016-1223-2), 2016-10-01
Supplement: 12859_2016_1223_MOESM1_ESM.pdf [file 12859_2016_1223_MOESM1_ESM.pdf]

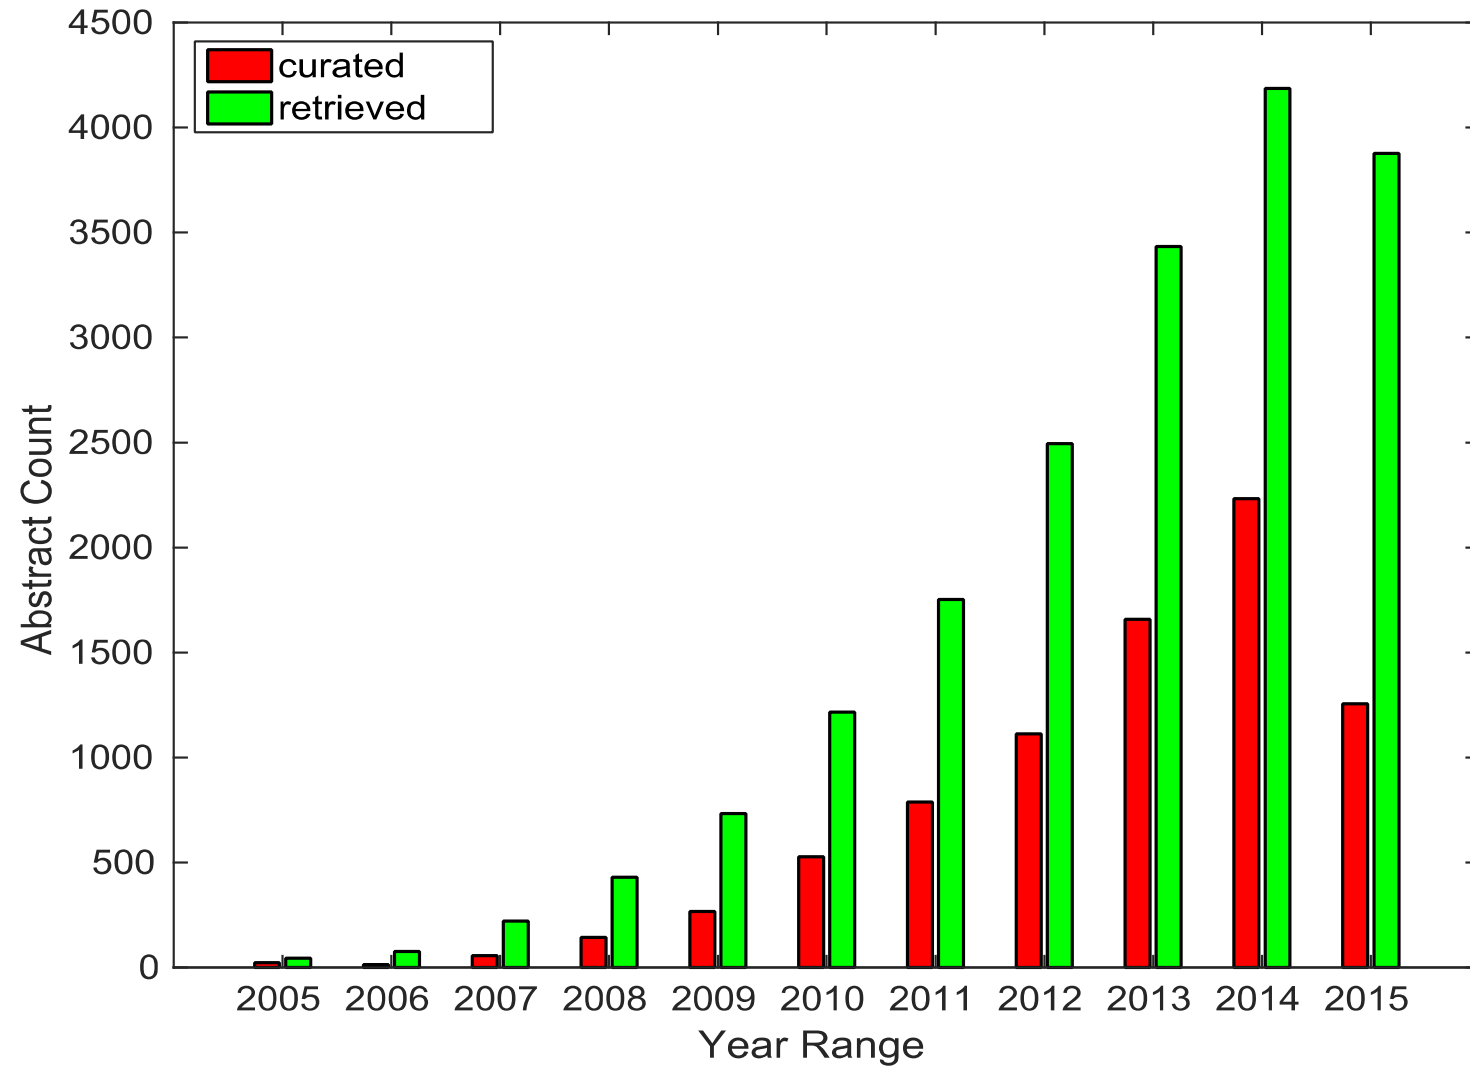

**Fig. S1** Number of human miRNA abstracts by year, for curated and retrieved collections (prior to filtering).

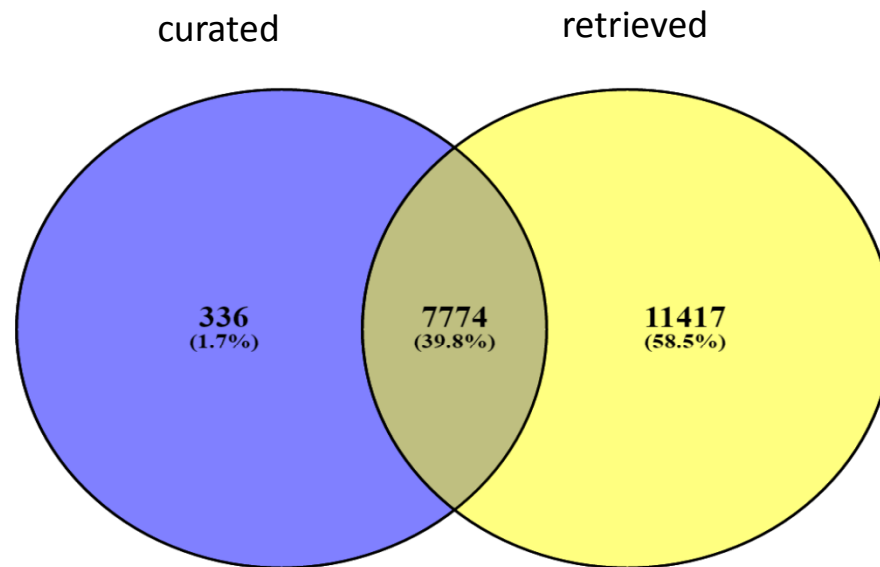

**Fig. S2** Overlap between citations from curated and retrieved collections (prior to filtering).

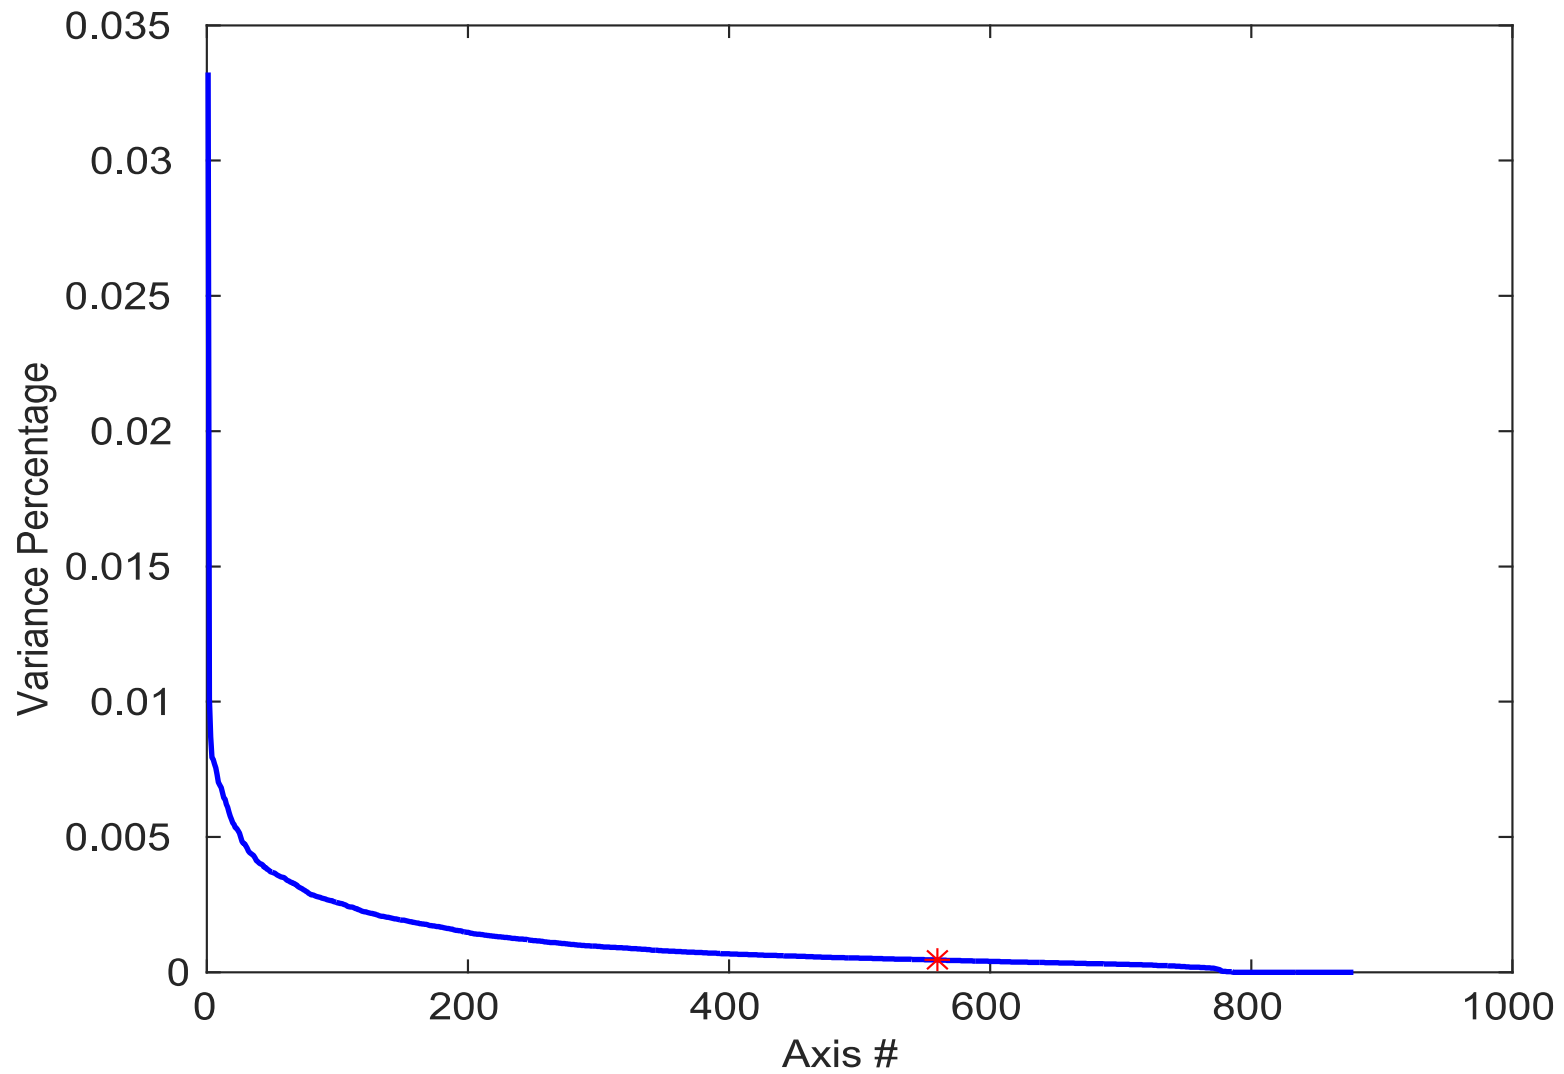

**Fig. S3** Percentage of variance captured by each factor (axis).
